# Supplementary material for: Sunlight induced photo-thermal synergistic catalytic CO2 conversion via localized surface plasmon resonance of MoO3−x
Source: Royal Society of Chemistry journal article supplement (doi:10.1039/c8ta10922b), 2019-01-01
Supplement: c8ta10922b1.pdf [file c8ta10922b1.pdf]

**Supporting material:**

**Sunlight Induced Photo-thermal Synergistic Catalytic  
CO<sub>2</sub> Conversion via Localized Surface Plasmon  
Resonance of MoO<sub>3-x</sub>**

Jue Li,<sup>a#</sup> Yinghao Ye,<sup>b#</sup> Liqun Ye,<sup>ad\*</sup> Fengyun Su,<sup>a</sup> Zhaoyu Ma,<sup>a</sup> Jindi Huang,<sup>a</sup> Haiquan Xie,<sup>a</sup> Dmitry E. Doronkin,<sup>c</sup> Anna Zimina,<sup>c</sup> Jan-Dierk Grunwaldt,<sup>c</sup> Ying Zhou,<sup>b\*</sup>

a. Engineering Technology Research Center of Henan Province for Solar Catalysis, College of Chemistry and Pharmaceutical Engineering, Nanyang Normal University, Nanyang 473061, P. R. China.

b. State Key Laboratory of Oil and Gas Reservoir Geology and Exploitation, School of Materials Science and Engineering, Southwest Petroleum University, Chengdu, 610500, P. R. China.

c. Institute for Chemical Technology and Polymer Chemistry and Institute of Catalysis Research and Technology, Karlsruhe Institute of Technology, 76131 Karlsruhe, Germany.

d. College of Materials and Chemical Engineering, Key Laboratory of Inorganic Nonmetallic Crystalline and Energy Conversion Materials, China Three Gorges University, Yichang 443002, P. R. China.

**Corresponding Author**

\* Prof. Liqun Ye

E-mail: [yeliquny@163.com](mailto:yeliquny@163.com)

\* Prof. Ying Zhou

E-mail: [yzhou@swpu.edu.cn](mailto:yzhou@swpu.edu.cn)

#The authors contributed equally.

## **Experimental section**

### **1 Synthesis**

#### 1.1 Materials

Molybdenum metal powder, hydrogen peroxide (H<sub>2</sub>O<sub>2</sub>, 30 wt%), 1-butanol, and were respectively purchased from Macklin, Feng Chuan Technology Co., Ltd., DeNen Reagents Ltd., Kermel Reagents Ltd..

#### 1.2 Synthesis of the plasmonic MoO<sub>3-x</sub> nanosheets

In a typical synthetic procedure, 2 mmol of molybdenum metal powder was added to a beaker (50 mL) containing 24 mL of 1-butanol. Then 3 mL of H<sub>2</sub>O<sub>2</sub> was introduced and magnetically stirred for about 30 min to obtain the transparent yellow solution. The solution was transferred to a PTFE reactor, sealed in a stainless steel autoclave, heated and maintained at 140 °C for 12 h. After cooling down to room temperature (no active cooling was used), the product was collected by centrifugation, rinsed with ethanol for three times and finally dried at 60 °C in a vacuum drying oven. The dried sample was ground and stored as MoO<sub>3-x</sub>. For comparison, two more MoO<sub>3-x</sub> samples were prepared using a similar procedure with ethanol and isopropanol as solvents.

#### 1.3 Synthesis of the MoO<sub>3</sub> nanosheets

The prepared MoO<sub>3-x</sub> sample was placed in a tube furnace and heated at 10 to 600 degrees per minute for 6 hours under an oxygen atmosphere. The calcined sample with oxygen vacancies filled during calcination was defined as MoO<sub>3</sub>.

## **2 DFT Calculation**

Density functional theory (DFT) calculations were performed using DMol3 procedure based on the Materials Studio software. The electron exchange and correlation were approximated by generalized gradient approximation (GGA) with the Perdew-Burke-Ernzerhof (PBE) functional. Dispersion correction by TS (DFT-D) was used to describe the van der Waals interaction. The valence electron configurations were 1s<sup>1</sup> for H, 2s<sup>2</sup>2p<sup>2</sup> for C, 2s<sup>2</sup>2p<sup>4</sup> for O and 4d<sup>5</sup>4s<sup>1</sup> for Mo, respectively. As for the Monkhorst-Pack grid k-point in the Brillouin-zone, a 5×5×1 k-point was used for geometry optimizations. For convergence threshold, the total

energy of the system, maxforce, and displacement tolerances were set to be  $1 \times 10^{-5}$  Ha,  $0.02 \text{ Ha}/\text{\AA}$ , and  $0.05 \text{ \AA}$ , respectively. (J. Perdew, K. Burke, M. Ernzerhof, Generalized Gradient Approximation Made Simple, *Physical Review Letters*, 1996, 77, 3865-3868; Junli Zhang, Jiecai Fu, Fangyi Shi, Yong Peng, Mingsu Si, Luigi Cavallo, Zhen Cao, Hydrogen atom induced magnetic behaviors in two-dimensional materials: insight on origination in the model of  $\alpha\text{-MoO}_3$ , *Nanoscale*, 2018, 10, 14100; Yue Peng, Wenzhe Si, Xiang Li, Jinming Luo, Junhua Li, John Crittenden, Jiming Hao, Comparison of  $\text{MoO}_3$  and  $\text{WO}_3$  on arsenic poisoning  $\text{V}_2\text{O}_5/\text{TiO}_2$  catalyst: DRIFTS and DFT study, *Applied Catalysis B: Environmental*, 2016, 181, 692–698.)

### **3 Characterization**

X-ray diffraction (XRD) analysis of the phases and crystal structures of the samples was conducted using a Bruker D8 diffractometer with Cu K $\alpha$  radiation, and the scanning region was from  $5^\circ$  to  $80^\circ$  with the  $2\theta$  sweep speed of  $6^\circ \text{ min}^{-1}$ . Morphology of the photocatalysts was imaged using a scanning electron microscope (SEM, ZEISS Sigma 500). The finer morphologies and lattices were studied by transmission electron microscope (TEM) JEM-2100F. UV-Vis diffuse reflectance spectroscopy (DRS) of samples were obtained by a UV-Vis spectrometer (HITACHI, UH4150) with a scanning range of 200-2100 nm. X-ray photoelectron spectroscopy (XPS) was performed on a Thermo Scientific ESCALAB 250XI X-ray photoelectron spectrometer (Al K $\alpha$ , 150 W, and C1s 284.6 eV). Oxygen vacancies were identified by electron spin resonance (ESR) on a JES FA200 from JEOL. Photoluminescence spectra with the wavelength up to 1000 nm were acquired on a LabRAM HR Evolution Raman spectrometer (Horiba) with 785-nm laser excitation. A Quantachrome Autosorb-IQ automated gas sorption system was utilized to assess the Brunauer–Emmett–Teller (BET) surface areas at 77K. Time-resolved PL spectra (266 nm excitation) were recorded by a FLS980 Multifunction Steady State and Transient State Fluorescence Spectrometer (Edinburgh Instruments, room temperature). Transient absorption spectra were recorded at 260 nm by a NTAS Transient State absorption Spectrometer (Beijing Perfect light Technology Co., Ltd., China).

X-ray absorption spectra in terms of X-ray Absorption Near Edge Structure

(XANES) and Extended X-ray Absorption Fine Structure (EXAFS) were measured at the CAT end station of the CAT-ACT beamline at the Synchrotron Radiation Source at KIT, Karlsruhe.[A. Zimina, K. Dardenne, M. A. Denecke, D. E. Doronkin, E. Huttel, H. Lichtenberg, S. Mangold, T. Pruessmann, J. Rothe, Th. Spangenberg, R. Steininger, T. Vitova, H. Geckeis, J.-D. Grunwaldt, Rev. Sci. Instrum. 2017, 88, 113113.] The samples were measured ex situ at the Mo K absorption edge in transmission mode in form of pellets pressed with cellulose. The spectra were normalized, energy-corrected and the EXAFS background subtracted and Fourier-transformed (in the k-range 3 – 14 Å<sup>-1</sup>) using the ATHENA program from the IFFEFIT software package.[B. Ravel, M. Newville, J. Synchrotron Radiat. 2005, 12, 537.]

#### **4 Photocatalytic reduction of CO<sub>2</sub>**

The photocatalytic CO<sub>2</sub> reduction activity was measured in a Labsolar-III AG (Beijing Perfect light Technology Co., Ltd., China) closed gas system. After adding 5 ml of deionized water (provides the water vapor required for carbon dioxide reduction) to the reactor, a hollow perforated cylindrical support and a magnet were placed, and 0.05 g of the catalyst powder was evenly spread on the surface of the glass disc (28.26 cm<sup>2</sup>). The glass disc is placed on the holder of the reactor. After the reactor was sealed under vacuum grease coating, the knob was turned on, purged with argon to remove air from the reactor, and then the knob was turned off. Subsequently, 1 ml of CO<sub>2</sub> was injected, and the gas was stirred with a magnet to obtain a uniform carbon dioxide atmosphere. After that, the reactor was irradiated from the top by a 300 W high pressure xenon lamp (PLS-SXE300, Beijing Perfect light Technology Co., Ltd., China). In the experiment, the whole spectrum is obtained by UV-visible infrared full-reverse reflective sheet, and the infrared-range light is obtained by adding a filter (> 800 nm), and the ultraviolet-visible is obtained by UV-visible full-reverse reflective sheet. The experiment with active cooling was performed at a constant temperature of 5 °C obtained using low-temperature thermostat bath (Shanghai Sunny Hengping Scientific Instrument Co., Ltd., China). During the irradiation, 1 mL of gas was taken from the reaction cell for subsequent qualitative analysis by GC9790II gas chromatography (GC, Zhejiang Fuli Analytical

Instrument Co., Ltd., China) equipped with a flame ionization detector (FID, GDX-01 columns). The quantification of the production yield was based on a calibration curve. The outlet gases were determined to be CO, CH<sub>4</sub> and CO<sub>2</sub>.

### **5 Photoelectrochemical measurements**

Transient photocurrent response and electrochemical impedance of the samples were measured in a three-electrode quartz cell containing Na<sub>2</sub>SO<sub>4</sub> (0.5 M) electrolyte solution and using a CHI660E electrochemical workstation (CHI Instruments, Shanghai, China). Samples were located on a fluorinated-tin-oxide (FTO) conducting glass as the working electrode. Ag/AgCl and Pt played the role of reference and counter electrodes, respectively.

### **6 In-situ Fourier transform infrared spectroscopy (FT-IR) analysis**

In-situ Fourier transform infrared spectroscopy was performed on a Nicolet IS-50 instrument. The sample was filled into an in-situ Harrick IR cell, and 1 atm CO<sub>2</sub> and H<sub>2</sub>O vapors (room temperature) were introduced into the cell and fiber source (FX300, Beijing Perfect Light Technology Co., Ltd., Beijing, China) through the CaF<sub>2</sub> window of the cell. Before the measurement, the samples were degassed at 423 K for 4 h.

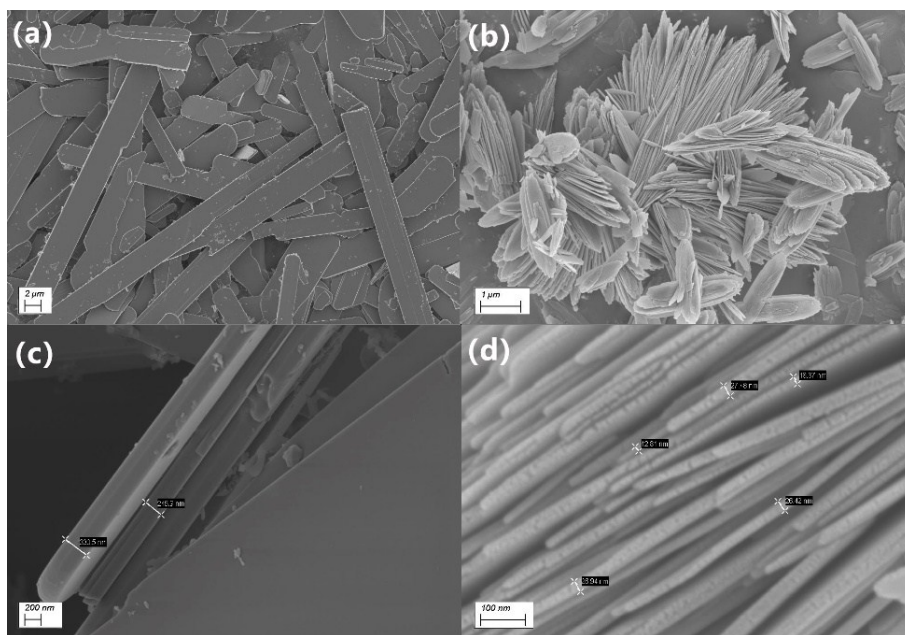

**Figure S1** SEM of  $\text{MoO}_3$  (a), (c) and  $\text{MoO}_{3-x}$  (b), (d).

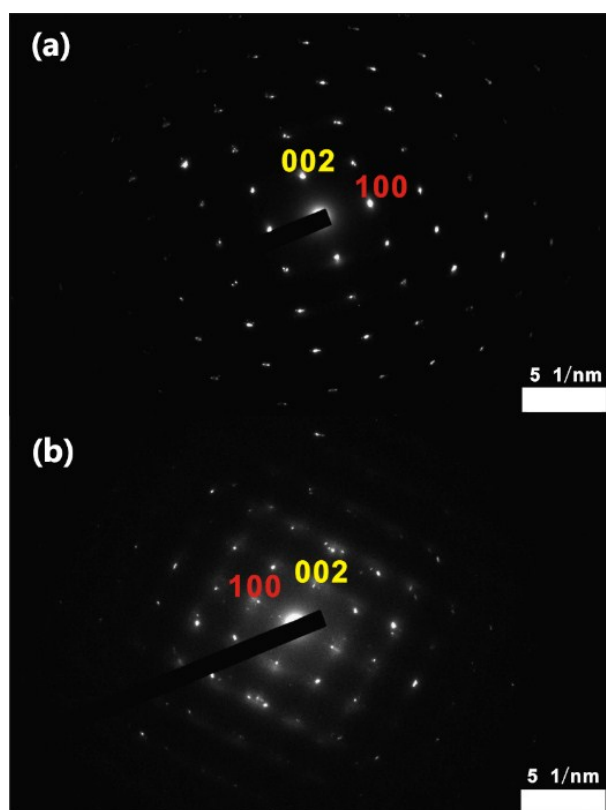

**Figure S2** SAED of  $\text{MoO}_3$  (a) and  $\text{MoO}_{3-x}$  (b).

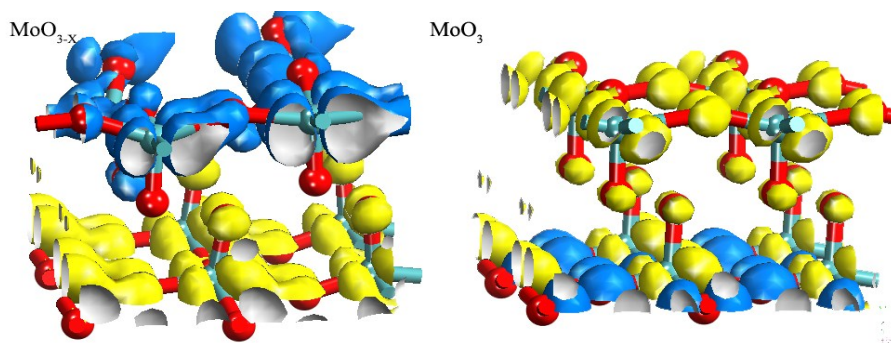

**Figure S3** Highest occupied molecular orbital (HOMO) and lowest unoccupied molecular orbital (LUMO) of the  $\text{MoO}_{3-x}$  and  $\text{MoO}_3$ . The blue and yellow are HOMO and LUMO, respectively.

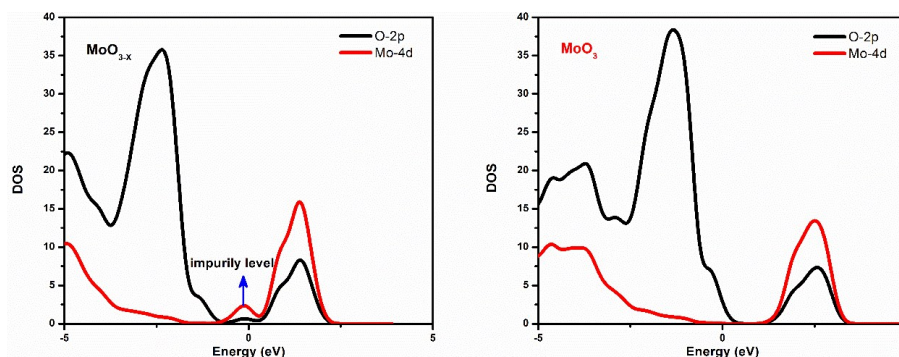

**Figure S4** DOS of  $\text{MoO}_{3-x}$  and  $\text{MoO}_3$ .

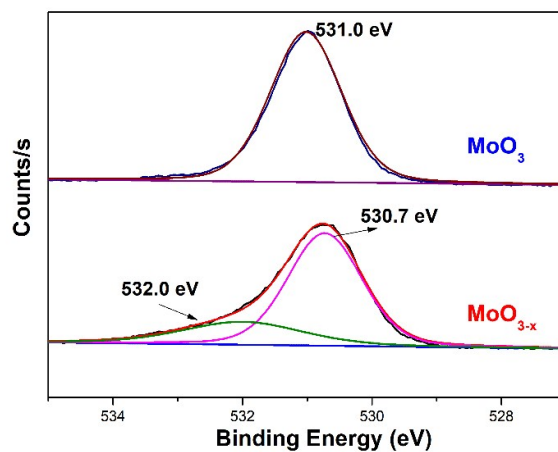

**Figure S5** O1s XPS spectra of  $\text{MoO}_{3-x}$  and  $\text{MoO}_3$ .

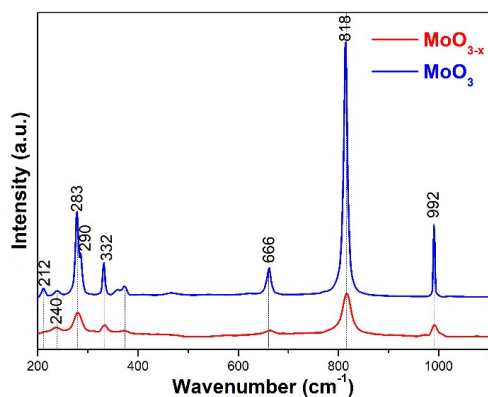

**Figure S6** Raman spectrum of  $\text{MoO}_{3-x}$  and  $\text{MoO}_3$ .

### Raman spectroscopy

The  $283\text{ cm}^{-1}$  bond represents the bending mode for the double bond ( $\text{Mo}=\text{O}$ ) vibration. The  $666\text{ cm}^{-1}$  peak is assigned to the tri-coordinated oxygen ( $\text{Mo}_3-\text{O}$ ) stretching mode, which results from edge-shared oxygen atoms in common to three adjacent octahedrons. The  $818\text{ cm}^{-1}$  peak is related to the bi-coordinated oxygen ( $\text{Mo}_2-\text{O}$ ) stretching mode, which results from corner-sharing oxygen atoms common to two octahedrons. The  $992\text{ cm}^{-1}$  peak is assigned to the terminal oxygen ( $\text{Mo}=\text{O}$ ) stretching mode, which results from an unshared oxygen. The peak at  $332\text{ cm}^{-1}$  can be assigned to  $\text{Mo}_3-\text{O}$  and the two weak peaks at  $212$  and  $240\text{ cm}^{-1}$  both represent the bending modes of  $\text{Mo}_2-\text{O}$ . [Nanoscale, 2016, 8, 8696-8703.] In the Raman spectra of  $\text{MoO}_{3-x}$ , compared with  $\text{MoO}_3$ , the peak intensity of  $\text{MoO}_{3-x}$  is significantly reduced. Some peaks are merging and even disappear, demonstrating the existence of oxygen vacancies in  $\text{MoO}_{3-x}$ . [Adv. Funct. Mater., 2016, 26, 91-100. ACS Appl. Mater. Interfaces, 2016, 8, 3482-3493.]

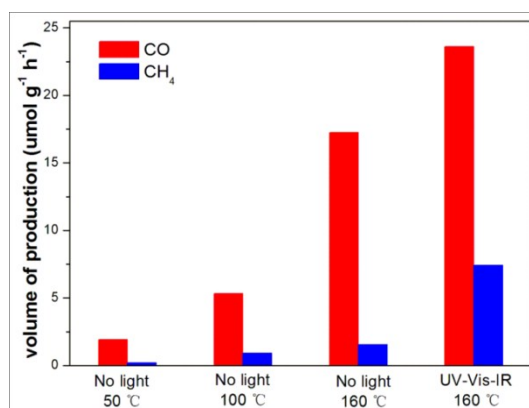

**Figure S7** Thermal catalytic  $\text{CO}_2$  reduction under different temperature without light irradiation.



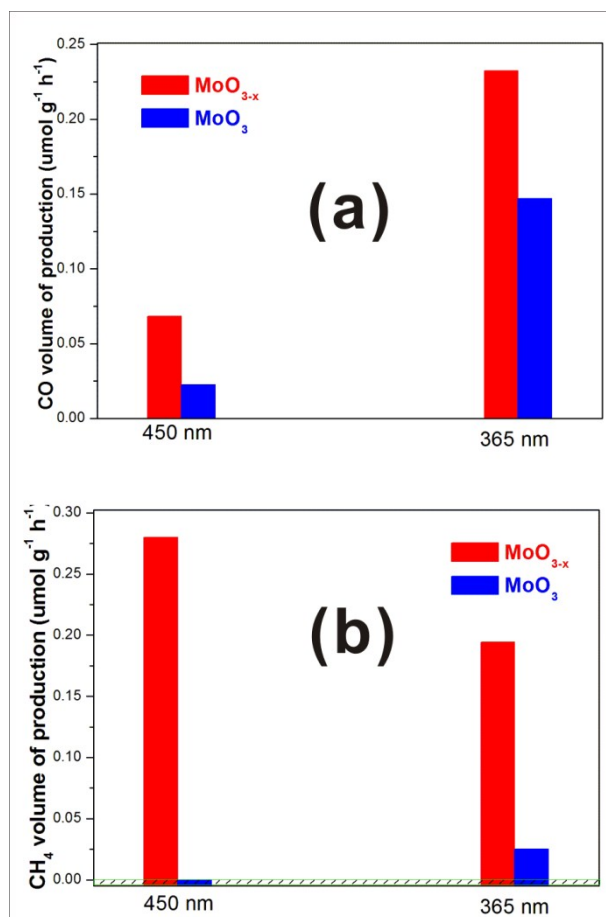

**Figure S8** Photocatalytic  $\text{CO}_2$  reduction under different wavelength LED light sources without heat effect.

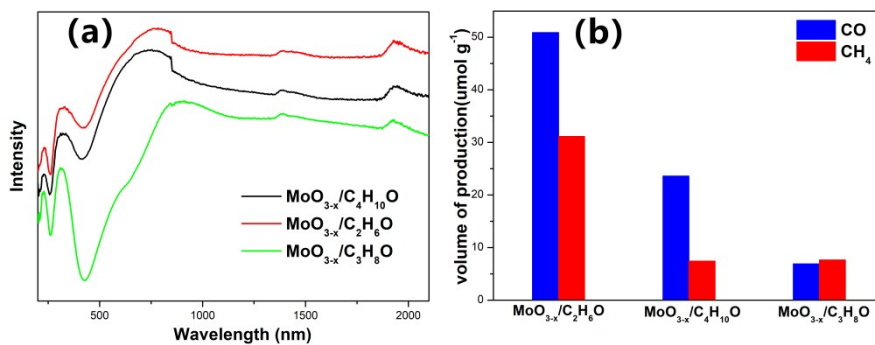

**Figure S9** DRS spectrum and sunlight induced photo-thermal synergistic catalytic activity for  $\text{CO}_2$  Conversion of  $\text{MoO}_{3-x}$  sample with ethanol, 1-butanol, isopropanol as solvent during  $\text{MoO}_{3-x}$  synthesis.

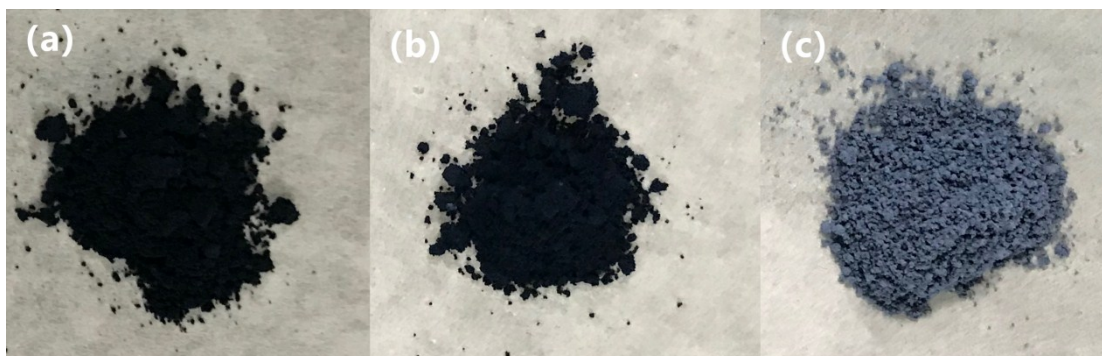

**Figure S10** Photograph of  $\text{MoO}_{3-x}$  samples synthesized using (a) ethanol, (b) 1-butanol, (c) isopropanol as solvent.

Solvent used in preparation affects the concentration of oxygen vacancies. Here, ethanol, isopropanol and 1-butanol were used as solvents to prepare three  $\text{MoO}_{3-x}$  samples. As shown in **Figure S9**, based on the color and UV-Vis-IR absorption, the three  $\text{MoO}_{3-x}$  samples have different amount of the oxygen vacancies. And ethanol results in the highest number of oxygen vacancies. We compared the photocatalytic  $\text{CO}_2$  reduction performance of three synthesized  $\text{MoO}_{3-x}$  samples. As shown in **Figure 10**, more oxygen vacancies result in the higher activity of  $\text{MoO}_{3-x}$ .

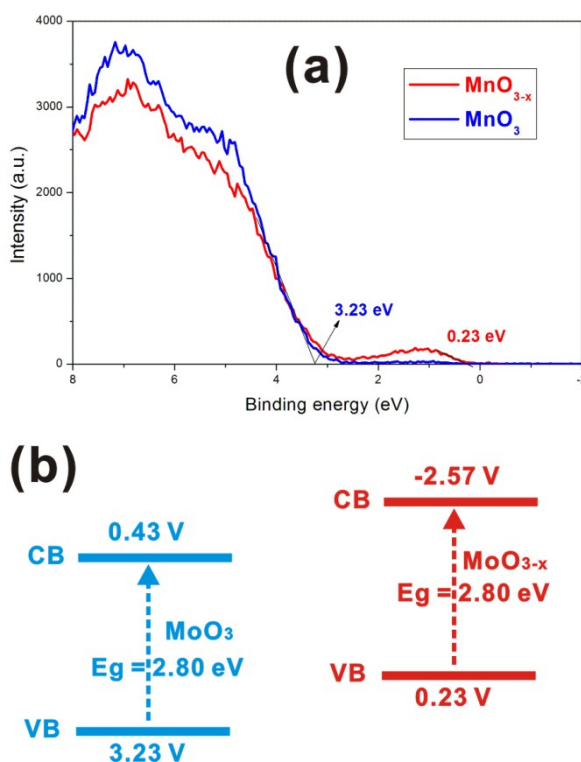

**Figure S11** VB-XPS spectrum and band structure of  $\text{MoO}_3$  and  $\text{MoO}_{3-x}$ .

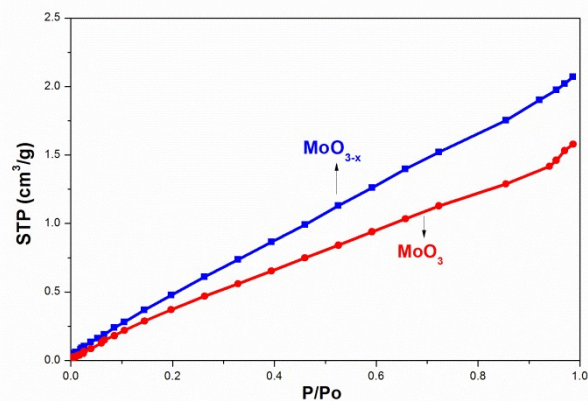

**Figure S12** CO<sub>2</sub> adsorption of MoO<sub>3</sub> and MoO<sub>3-x</sub>.

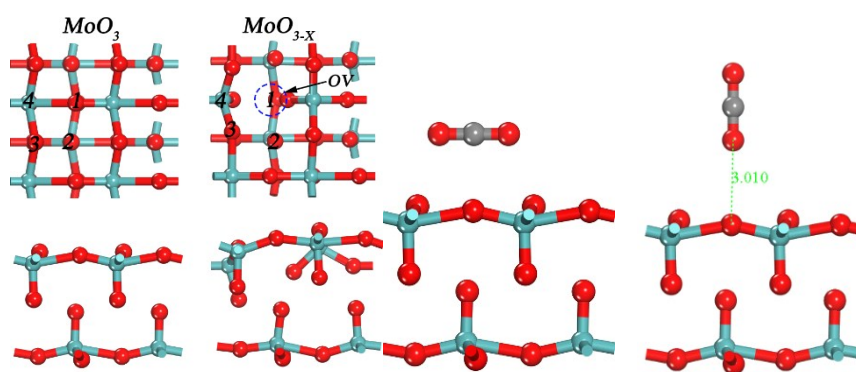

**Figure S13** The configurations of CO<sub>2</sub> adsorption on the MoO<sub>3</sub> and MoO<sub>3-x</sub> surface.

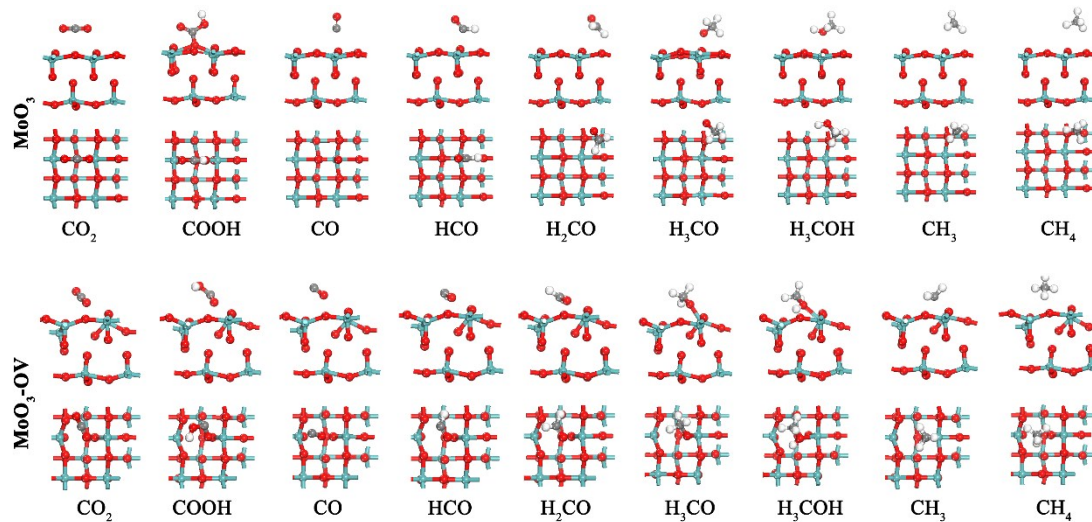

**Figure S14** The structures of various CO<sub>2</sub> reduction products on MoO<sub>3</sub> and MoO<sub>3-x</sub> surface.

**Table S1** The energy of CO<sub>2</sub> adsorption on MoO<sub>3</sub> and MoO<sub>3-x</sub> different sites

| sites | MoO <sub>3</sub> |               | MoO <sub>3-x</sub> |               |
|-------|------------------|---------------|--------------------|---------------|
|       | Horizontal (eV)  | Vertical (eV) | Horizontal (eV)    | Vertical (eV) |
| 1     | -0.32            | -0.10         | -0.33              | -0.38         |
| 2     | -0.21            | -0.08         | -0.31              | -0.07         |
| 3     | -0.14            | -0.08         | -0.33              | -0.08         |
| 4     | -0.31            | -0.17         | -0.30              | -0.30         |
